# Supplementary material for: The UKC3 regional coupled environmental prediction system
Source: Copernicus journal article supplement (doi:10.5194/gmd-2018-245), 2018-10-04
Supplement: Supplementary file 1 [file gmd-2018-245-supplement.zip]

# Supplementary Material to:

## The UKC3 regional coupled environmental prediction system

5 Huw W. Lewis<sup>1</sup>, Juan Manuel Castillo Sanchez<sup>1</sup>, Alex Arnold<sup>1</sup>, Joachim Fallmann<sup>1,a</sup>, Andrew Saulter<sup>1</sup>,  
Jennifer Graham<sup>1,b</sup>, Mike Bush<sup>1</sup>, John Siddorn<sup>1</sup>, Tamzin Palmer<sup>1</sup>, Adrian Lock<sup>1</sup>, John Edwards<sup>1</sup>, Lucy  
Bricheno<sup>2</sup>, Alberto Martínez de la Torre<sup>3</sup>, James Clark<sup>4</sup>

<sup>1</sup>Met Office, Exeter, EX1 3PB, UK

<sup>2</sup>National Oceanography Centre, Liverpool, L3 5DA, UK

10 <sup>3</sup>Centre for Ecology & Hydrology, Wallingford, OX10 8BB, UK

<sup>4</sup>Plymouth Marine Laboratory, Plymouth, PL1 2LP, UK

<sup>a</sup>now at: Institut für Physik der Atmosphäre, Johannes Gutenberg-Universität Mainz, Germany

<sup>b</sup>now at: Centre for Environment, Fisheries and Aquaculture Science, Pakefield Rd, Lowestoft NR33 0HT, UK

15 *Correspondence to:* Huw W. Lewis (huw.lewis@metoffice.gov.uk)

### S1 Introduction

20 This supplementary material to the main paper is designed to help users of the UKC3 system in configuring their systems  
correctly.

The configurations are made available to registered researchers as rose suites on the <https://code.metoffice.gov.uk/trac/roses->  
25 [u](https://code.metoffice.gov.uk/trac/roses-) repository, following the relevant suite id for a given configuration listed and linked to in Table 2.

### S2 Example rose namelists for UKC3 configurations of MetUM, JULES, NEMO and WAVEWATCH III namelists

30 The provided text file gmd-2018-ukc3-namelists.txt includes a set of MetUM, JULES, NEMO and WAVEWATCH III rose  
namelists for a UKC3 simulation run at MetUM code base vn10.6, JULES vn4.7, NEMO vn3.6 (r6632), WAVEWATCHIII  
(vn4.18).

35

S3 Code modifications applied for UKC3

A number of code adaptations were required in order to develop the UKC3 configuration, and associated UKA3, UKL3, UKO3 and UKW3 component and control configurations. These are summarised below. All code modifications were implemented as distinct branches from the baseline code (e.g. trunk). These branches are merged to form a single code set as part of the fcm\_make configuration build process within each rose suite prior to running. For convenience, a copy of the merged code for each component is made available to registered researchers to support collaboration, as described in the main paper (Table 1). The following tables provide supplementary detail on the underpinning code branches used for UKC3. All are also accessible to registered researchers, although the authors would recommend either working with the provided copy of the merged code or preferably making use of the rose suites described which include automated extraction, merging and compilation of the relevant codes from the various repositories using the fcm\_make functionality.

| Met Office Unified Model branch name    | Code revision         | Purpose                                                |
|-----------------------------------------|-----------------------|--------------------------------------------------------|
| ukeputils/trunk/gmd-2018-???/uka3/um    | <a href="#">UKA3</a>  | Merged copy of UKA3 MetUM code                         |
| <i>Contains merge of:</i>               |                       |                                                        |
| vn10.6 trunk                            | <a href="#">29689</a> | Root MetUM vn10.6 code base, tagged um10.6             |
| adrianlock/vn10.6_graup_to_jules        | <a href="#">30873</a> | Update application of graupel diagnostic in JULES      |
| juanmcastillo/vn10.6_non_ctile_coupling | <a href="#">41157</a> | Ensure valid coupling where coastlines not overlap     |
| juanmcastillo/vn10.6_ukep_rivrouting    | <a href="#">39329</a> | Enable relevant river routing diagnostics in JULES     |
| juanmcastillo/vn10.6_AtmWaveOasis       | <a href="#">40447</a> | Add wave coupling capability to MetUM                  |
| juanmcastillo/vn10.6_oasis-noncoupled   | <a href="#">39979</a> | Compile MetUM with coupling flags if not coupled       |
| juanmcastillo/vn10.6_l_param_conv-bug   | <a href="#">40119</a> | Fix issue with treatment of convective snow in coupler |

**Table S1: Summary of Met Office Unified Model code branches merged and used in the UKA3 and UKC3 system, containing relevant adaptations from the version 10.6 baseline code. All model codes are accessible via <https://code.metoffice.gov.uk/trac/um/wiki>. Registered users can directly access the copy of the merged code provided and each separate code branch listed at the revision used in UKC3 by following the direct code revision links provided in the Table.**

| JULES land surface model branch name    | Code revision         | Purpose                                                 |
|-----------------------------------------|-----------------------|---------------------------------------------------------|
| ukeputils/trunk/gmd-2018-???/uka3/jules | <a href="#">UKL3</a>  | Merged copy of UKA3/UKL3 JULES code                     |
| <i>Contains merge of:</i>               |                       |                                                         |
| vn4.7 trunk                             | <a href="#">5320</a>  | Root MetUM vn4.7 code base, tagged um10.6               |
| adrianlock/vn4.7_graup_to_jules         | <a href="#">5769</a>  | Update application of graupel diagnostic in JULES       |
| juanmcastillo/vn4.7_ukep_hydrol         | <a href="#">10045</a> | Apply Martinez et al. (2018) recommendations            |
| juanmcastillo/vn4.7_ukep_river_fixes    | <a href="#">10052</a> | Apply trunk code modification to routing not at vn4.7   |
| juanmcastillo/vn4.7_AtmWaveOasis        | <a href="#">9190</a>  | Implement wave coupling within surface exchange         |
| johnmedwards/vn4.7_debug_surfex2        | <a href="#">9388</a>  | Modify iteration initial condition for surface exchange |

**Table S2: Summary of JULES code branches merged and used in the UKA3/UKL3 and UKC3 system, containing relevant adaptations from the version 4.7 baseline code. All model codes are accessible via <https://code.metoffice.gov.uk/trac/jules/wiki>. Registered users can directly access the copy of the merged code provided and each separate code branch listed at the revision used in UKC3 by following the direct code revision links provided in the Table.**

| NEMO ocean model branch name           | Code revision        | Purpose                                            |
|----------------------------------------|----------------------|----------------------------------------------------|
| ukeputils/trunk/gmd-2018-???/uko3/nemo | <a href="#">UKO3</a> | Merged copy of UKO3 NEMO code                      |
| <i>Contains merge of:</i>              |                      |                                                    |
| vn3.6 trunk                            | <a href="#">6232</a> | Root NEMO vn3.6 code revision used for UKO3        |
| UKMO/AMM15_v3_6_STABLE_package         | <a href="#">8918</a> | Updates t o vn3.6 for shelf seas configuration     |
| UKMO/r6232_CO6_CO5_zenv_pomsdwl        | <a href="#">8412</a> | Enable back compatibility with CO5 configuration   |
| UKMO/r6232_hadgem3_mct                 | <a href="#">7457</a> | Add OASIS-MCT compatibility                        |
| UKMO/r6232_hadgem3_cplseq              | <a href="#">7460</a> | Set the required order of coupling fields          |
| r6232_hadgem3_cplfld                   | <a href="#">7463</a> | Treat non-standard aspects of atmospheric coupling |
| UKMO/r6232_sst_landsea_cpl             | <a href="#">7466</a> | Distinguish NEMO land SST values for coupling      |
| UKMO/r6232_HZG_WAVE-coupling           | <a href="#">8917</a> | Enable coupling of variables with wave model       |
| UKMO/r6232_rnf_cplmask                 | <a href="#">9283</a> | Apply river discharge coupling over a sub-domain   |

**Table S3: Summary of NEMO code branches merged and used in the UKO3 and UKC3 system, containing relevant adaptations from the baseline trunk code at version 3.6 (revision 6232). Model codes are accessible via <http://www.nemo-ocean.eu>. Registered users can directly access the copy of the merged code provided and each separate code branch listed at the revision used in UKC3 by following the direct code revision links provided.**

| NEMO compilation keys used in UKC3 and UKO3 |                                              |
|---------------------------------------------|----------------------------------------------|
| key_zdfgls                                  | GLS generic length scale vertical mixing     |
| key_ldfslp                                  | Lateral diffusion                            |
| key_dynspg_ts                               | Split-explicit free surface                  |
| key_vectopt_loop                            | Inner loop index order                       |
| key_bdy                                     | Unstructured open boundary conditions        |
| key_tide                                    | Tidal potential forcing                      |
| key_vvl                                     | Variable volume non-linear free surface      |
| key_shelf                                   | Implement Met Office shelf seas flux forcing |
| key_harm_ana                                | Calculate harmonic analysis                  |

**Table S4: Summary of NEMO compilation keys used in the UKC3 system.**

| WAVEWATCH III branch name               | Code revision        | Purpose                                             |
|-----------------------------------------|----------------------|-----------------------------------------------------|
| ukeputils/trunk/gmd-2018-??/ukw3        | <a href="#">UKW3</a> | Copy of UKW3 WAVEWATCH III code                     |
| <i>Contains:</i>                        |                      |                                                     |
| WW3v4/branches/dev/frhl/r966_ww3v4_ukep | <a href="#">1782</a> | New implementation of wave coupling to A and O code |

**Table S5: Summary of WAVEWATCH III code branch used in the UKC3 system, containing relevant adaptations from the baseline trunk code at version 4.18. This code can be shared with registered users of WAVEWATCHIII, with further details available at <http://polar.ncep.noaa.gov/waves/wavewatch/>.**

| WAVEWATCH III compilation switches used in UKC2 and UKW2 |                                             |         |                                                  |
|----------------------------------------------------------|---------------------------------------------|---------|--------------------------------------------------|
| ST3                                                      | WAM 4 and variants source term package      | RTD     | Rotated coordinate system                        |
| STAB3                                                    | Stability correction (not invoked)          | WNT1    | Linear wind speed interpolation in time          |
| NL1                                                      | Discrete interaction approximation          | CRT1    | Linear current interpolation in time             |
| BT1                                                      | JONSWAP bottom friction formulation         | WNX1    | Approx. linear wind speed interpolation in space |
| DB1                                                      | Battjes-Janssen depth-induced breaking      | CRX1    | Approx. linear current interpolation in space    |
| TR0                                                      | No triad interactions                       | FLX0    | Flux computation included in source terms        |
| BS0                                                      | No bottom scattering                        | RWND    | Correct wind speeds for current velocity         |
| XX0                                                      | No supplemental source terms                | REF0    | No source term for reflection                    |
| LN1                                                      | Cavaleri and Malanotte-Rizzoli linear input | PR3/UNO | Second order propagation scheme                  |

**Table S6: Summary of WAVEWATCH III compile switches used in the UKC3 system.**
